# Supplementary material for: A new bisglycolamide substituted calix[4]arene-benzo-crown-6 for the selective removal of cesium ion: combined experimental and density functional theoretical investigation
Source: Royal Society of Chemistry journal article supplement (doi:10.1039/c6ra05814k), 2016-01-01
Supplement: c6ra05814k1.pdf [file c6ra05814k1.pdf]

## Electronic Supplementary Information (ESI)

### **A new bisglycolamide substituted calix[4]arene-benzo-crown-6 for the selective removal of Cesium ion: Combined experimental and density functional theoretical investigation**

Vikas Kumar<sup>a\*</sup>, J. N. Sharma<sup>b</sup>, P.V.Achuthan<sup>c</sup>, D.K. Singh<sup>a</sup>, Sk. Musharaf Ali<sup>d\*</sup>

<sup>a</sup> *Materials Group, Bhabha Atomic Research Centre, Trombay,*

<sup>b</sup> *Nuclear Recycle Group, Bhabha Atomic Research Centre, Trombay,*

<sup>c</sup> *NRB, Trombay, Mumbai, INDIA*

<sup>d</sup> *Chemical Engineering Division, Bhabha Atomic Research Centre, Trombay,*

*\*musharaf@barc.gov.in; vikasgulia20@gmail.com*

Figure S1: <sup>1</sup>H NMR of 1,3-dipropenyloxy calix-benzo-crown (4):

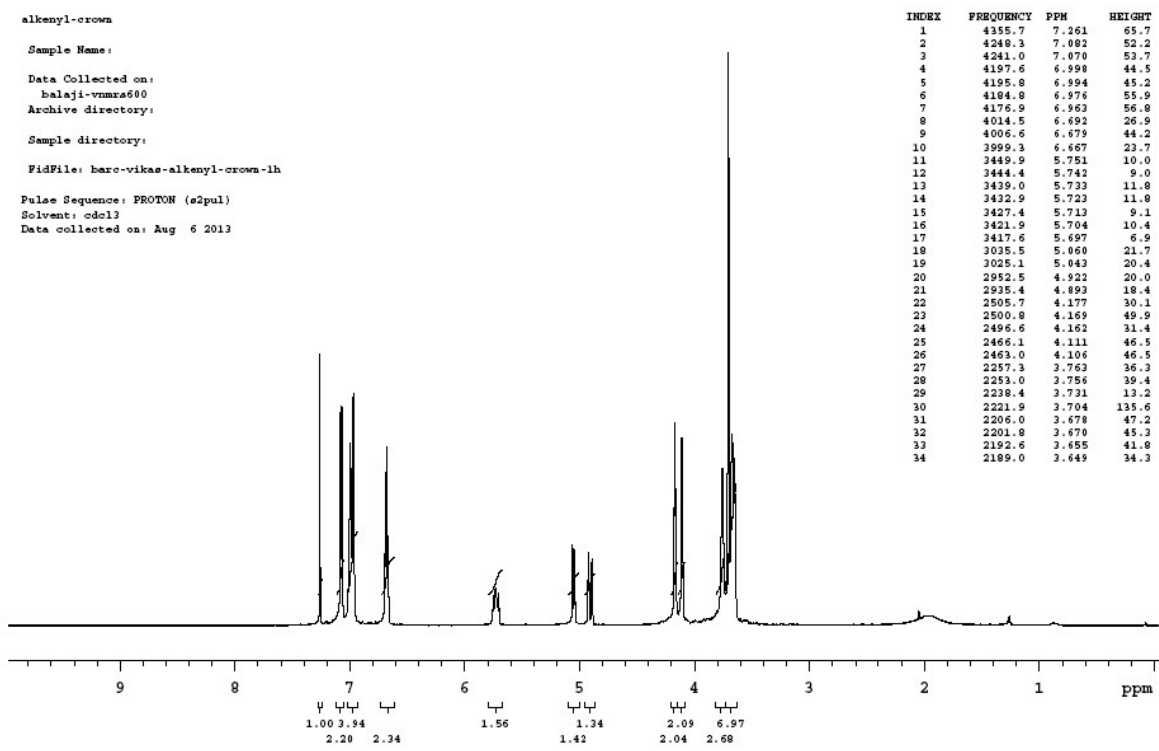

Figure S2: <sup>13</sup>C NMR of 1,3-dipropenyloxy calix-benzo-crown (4):

calix crown amide

Sample Name:  
alkenyl-crown  
Data Collected on:  
balaji-vmmrs600  
Archive directory:

Sample directory:

FidFile: barc-vikas-alkenyl-crown-13c

Pulse Sequence: CARBON (s2pul)  
Solvent: cdcl3  
Data collected on: Aug 6 2013

| INDEX | FREQUENCY | PPM     | HEIGHT |
|-------|-----------|---------|--------|
| 1     | 23539.5   | 156.058 | 15.7   |
| 2     | 23497.9   | 155.782 | 13.3   |
| 3     | 22462.1   | 149.916 | 16.5   |
| 4     | 20256.5   | 134.294 | 34.7   |
| 5     | 20140.9   | 133.527 | 44.8   |
| 6     | 20127.1   | 133.435 | 39.3   |
| 7     | 19761.8   | 131.013 | 63.6   |
| 8     | 19627.7   | 130.125 | 58.6   |
| 9     | 18457.8   | 122.369 | 19.7   |
| 10    | 18434.7   | 122.216 | 27.7   |
| 11    | 18370.0   | 121.786 | 22.6   |
| 12    | 17473.0   | 115.839 | 41.5   |
| 13    | 17343.5   | 114.981 | 16.4   |
| 14    | 11642.2   | 77.184  | 136.7  |
| 15    | 11609.9   | 76.969  | 112.3  |
| 16    | 11592.1   | 76.785  | 93.4   |
| 17    | 10699.7   | 70.869  | 26.4   |
| 18    | 10675.9   | 70.777  | 41.9   |
| 19    | 10625.0   | 70.440  | 37.9   |
| 20    | 10583.4   | 70.164  | 37.8   |
| 21    | 10472.4   | 69.428  | 38.5   |
| 22    | 5658.9    | 37.517  | 43.2   |

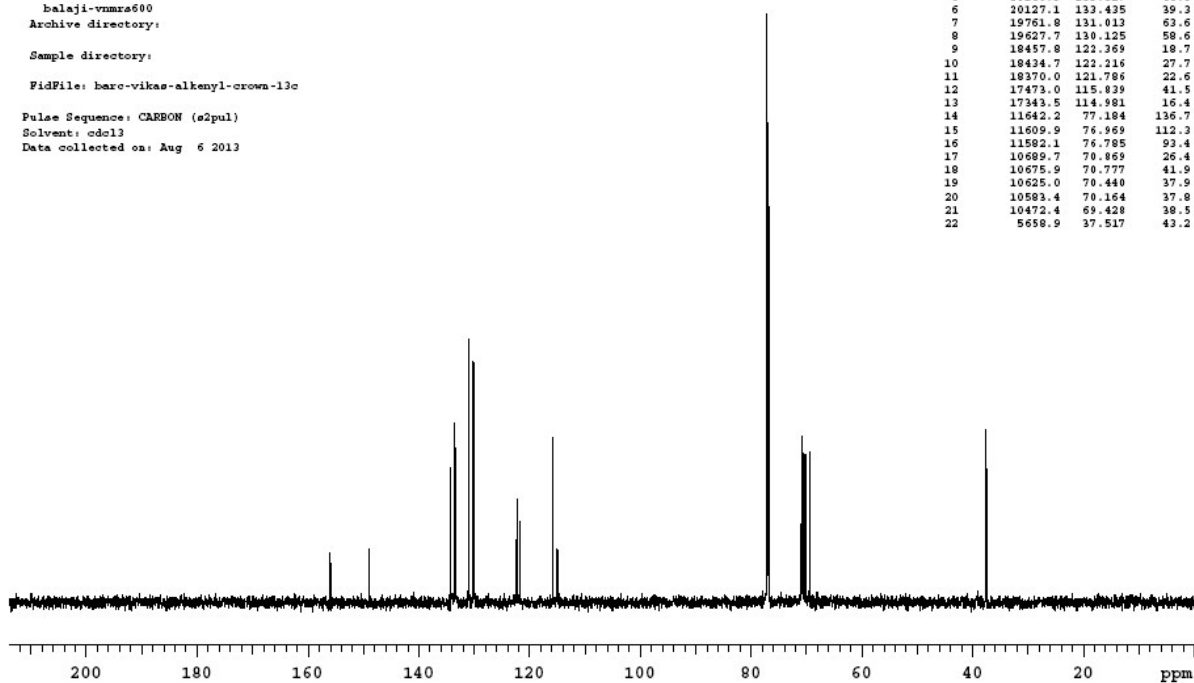

Figure S3: ESI-MS spectra of 1,3-dipropenyloxy calix-benzo-crown (4):

Spectrum Plot - 1/3/2014 3:23 PM

1 A Scan 22 from ...ata\external\barc-vikas\newatbenzyl cc-755.xms

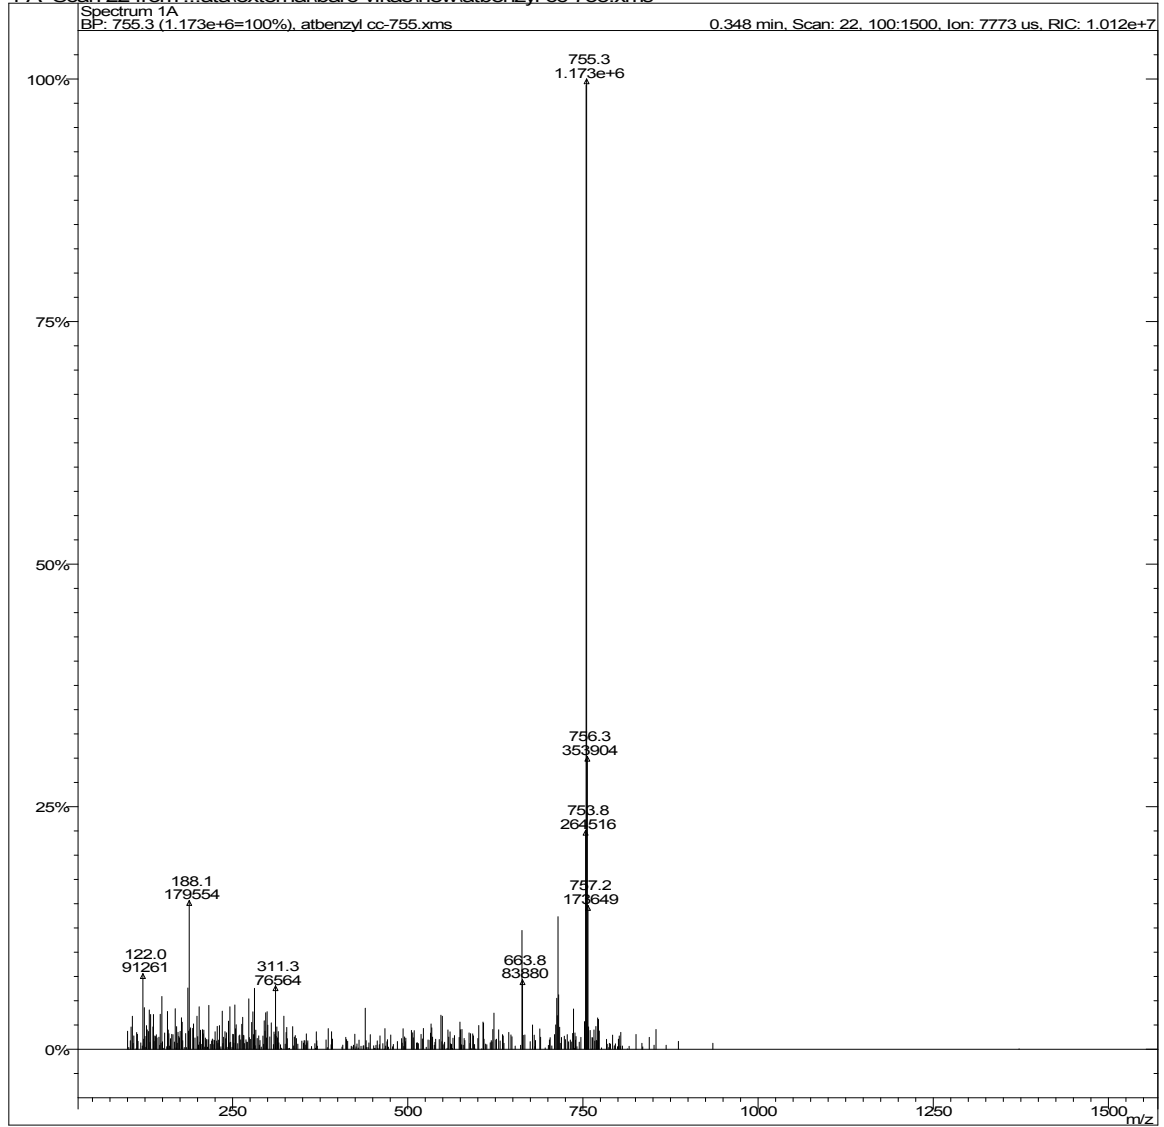

Figure S4: <sup>1</sup>H NMR of 1,3-dipropoxy calix[4]arene-benzocrown diol(5):

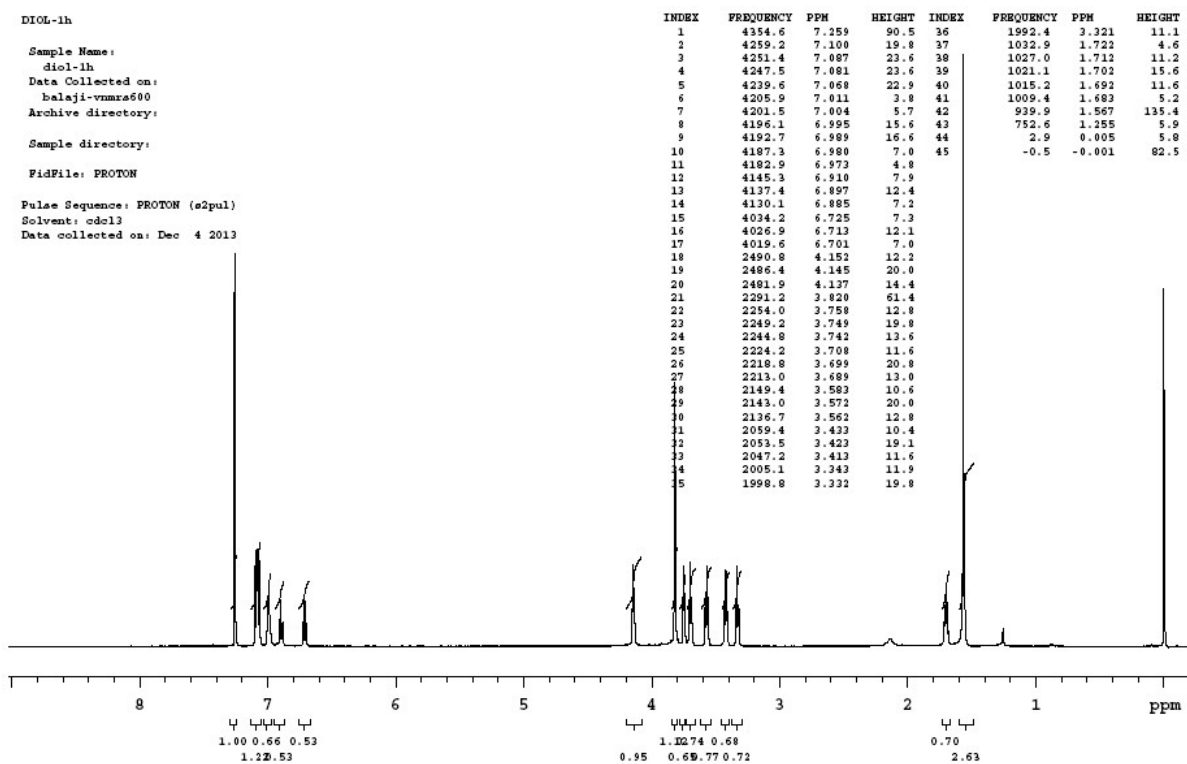

Figure S5: <sup>13</sup>C NMR of 1,3-dipropoxy calix[4]arene-benzocrown diol(5):

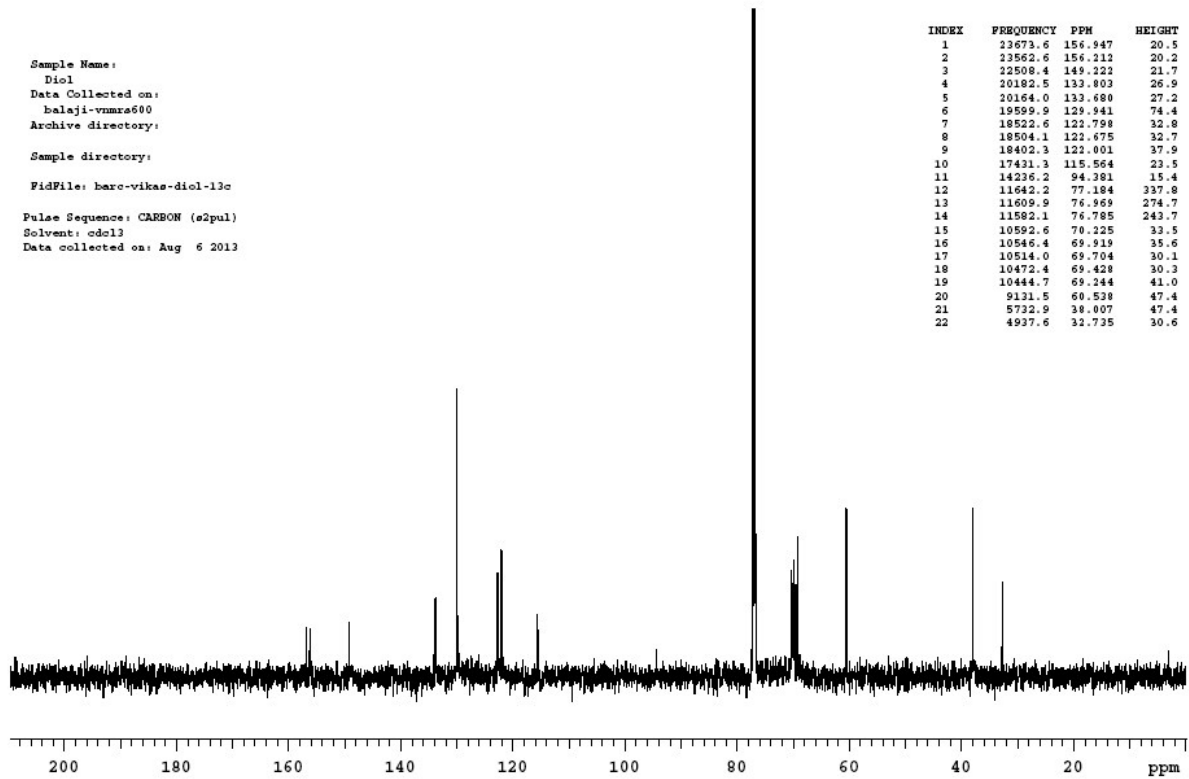

Figure S6: ESI-MS spectra of 1,3-dipropoxy calix[4]arene-benzocrown diol(5):

Spectrum Plot - 1/3/2014 3:39 PM

1 A Scan 55 from c:\data\external\barc-vikas\new\diol-791.xms

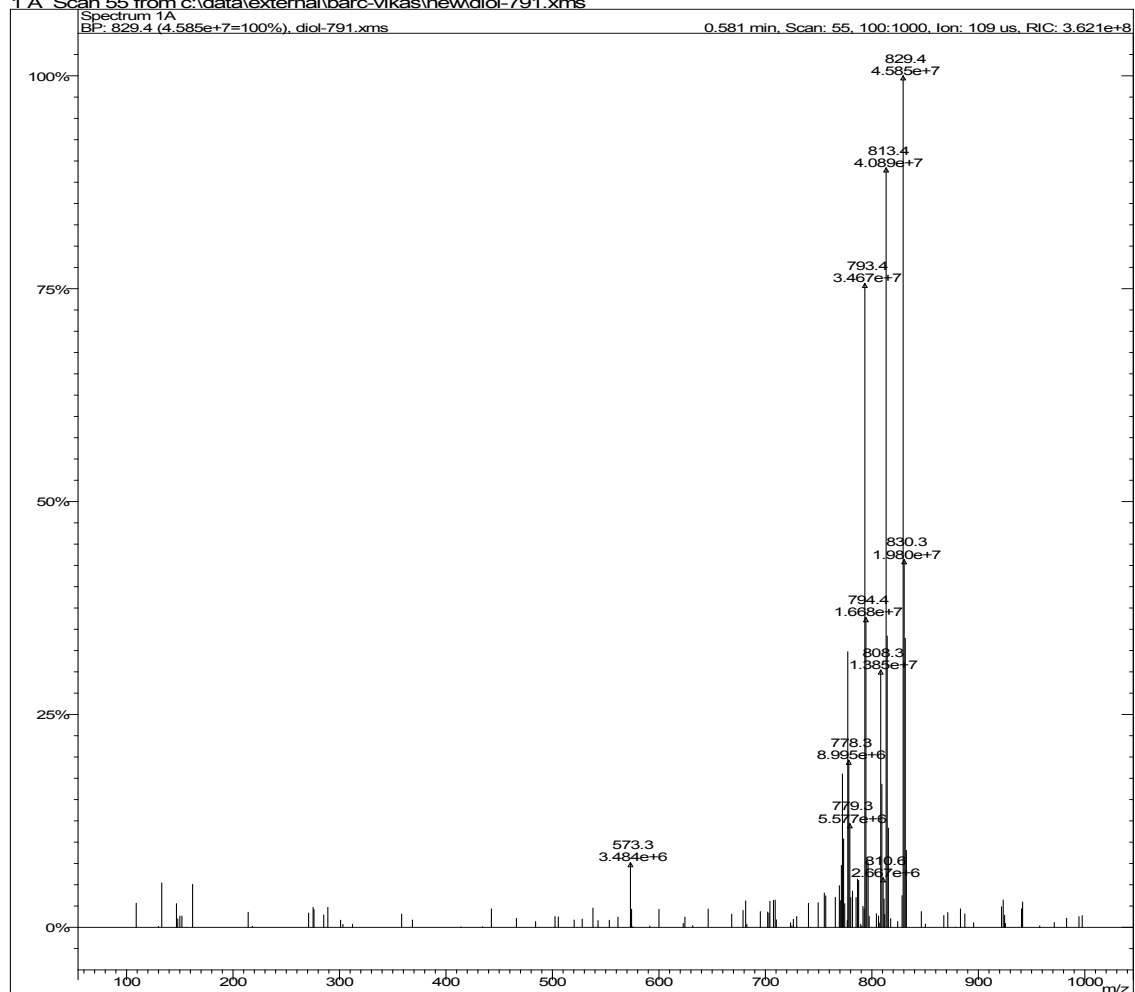

Figure S7:  $^1\text{H}$  NMR of 1,3- alternate Calix[4]arene-benzocrown-bisglycolamide (6)

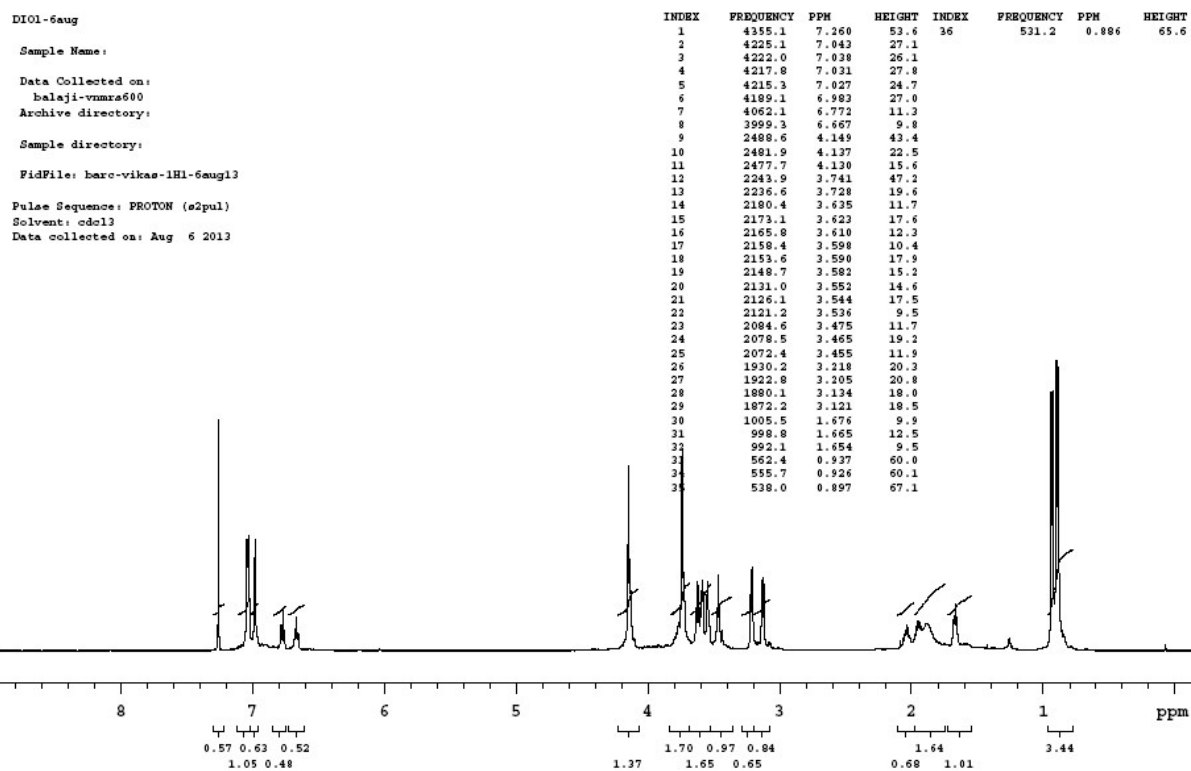

Figure S 8:  $^{13}\text{C}$  NMR of 1,3- alternate Calix[4]arene-benzocrown-bisglycolamide (6)



CBCDA-13c

Sample Name:  
CBCDA-13c  
Data Collected on:  
balaji-vnmr600  
Archive directory:

Sample directory:

FidFile: CARBON

Pulse Sequence: CARBON (s2pul)  
Solvent: cdcl3  
Data collected on: Dec 4 2013

| INDEX | FREQUENCY | PPM     | HEIGHT |
|-------|-----------|---------|--------|
| 1     | 25571.7   | 169.531 | 24.8   |
| 2     | 23606.4   | 156.502 | 23.3   |
| 3     | 23565.9   | 156.234 | 23.8   |
| 4     | 22482.6   | 149.051 | 20.9   |
| 5     | 20201.4   | 133.928 | 37.7   |
| 6     | 20186.9   | 133.832 | 36.1   |
| 7     | 19597.1   | 129.922 | 47.9   |
| 8     | 19578.1   | 129.796 | 40.4   |
| 9     | 18423.7   | 122.143 | 27.8   |
| 10    | 18412.3   | 122.067 | 26.2   |
| 11    | 18377.2   | 121.834 | 33.5   |
| 12    | 17395.3   | 115.325 | 26.1   |
| 13    | 11634.3   | 77.132  | 170.8  |
| 14    | 11603.1   | 76.924  | 169.8  |
| 15    | 11571.0   | 76.712  | 171.6  |
| 16    | 10591.4   | 70.217  | 38.8   |
| 17    | 10575.4   | 70.111  | 44.1   |
| 18    | 10565.5   | 70.045  | 41.5   |
| 19    | 10499.1   | 69.605  | 31.2   |
| 20    | 10361.0   | 68.690  | 36.6   |
| 21    | 10265.6   | 68.057  | 21.8   |
| 22    | 10259.5   | 68.017  | 29.9   |
| 23    | 8155.3    | 54.067  | 36.7   |
| 24    | 7883.0    | 52.261  | 39.2   |
| 25    | 5826.1    | 38.625  | 19.6   |
| 26    | 5672.7    | 37.608  | 41.8   |
| 27    | 4480.3    | 29.702  | 33.1   |
| 28    | 4461.9    | 29.581  | 31.3   |
| 29    | 4346.7    | 28.817  | 20.0   |
| 30    | 4111.0    | 27.254  | 39.7   |
| 31    | 3937.0    | 26.101  | 43.7   |
| 32    | 3449.5    | 22.869  | 19.4   |
| 33    | 3025.3    | 20.057  | 53.2   |
| 34    | 3013.1    | 19.976  | 47.6   |

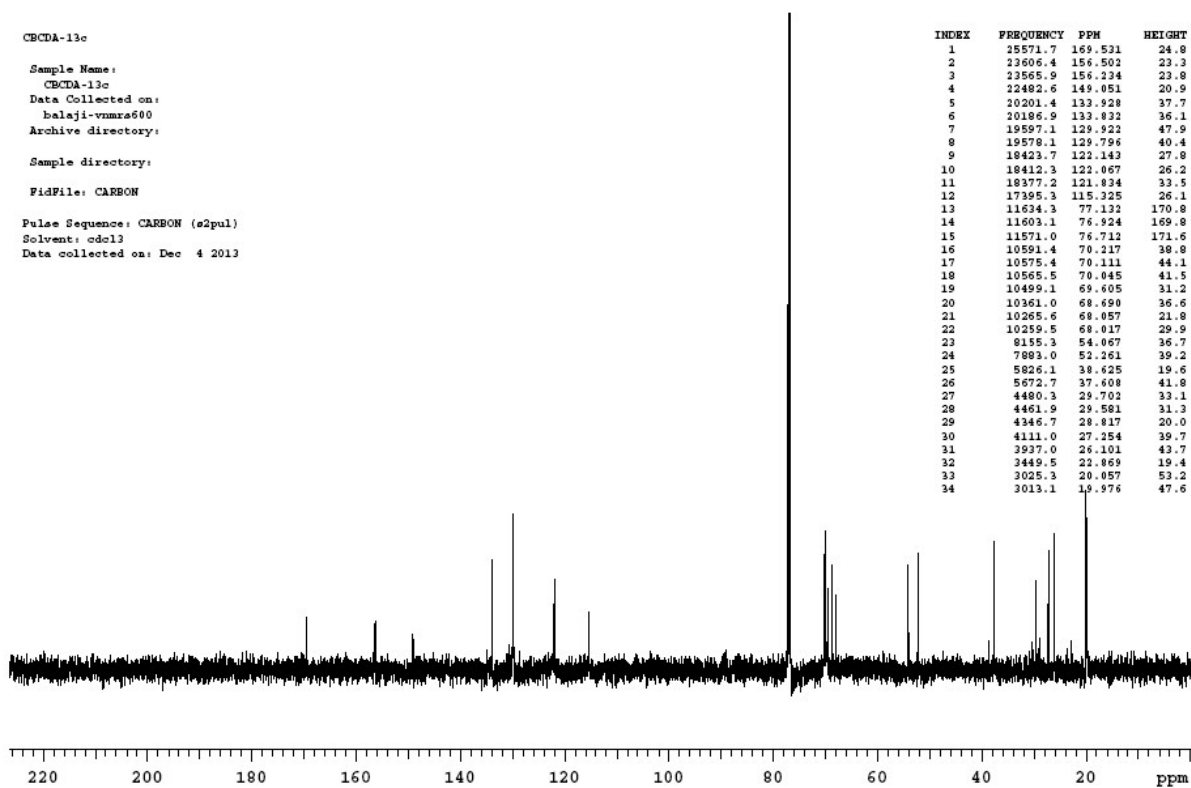

Figure S9: ESI-MS spectra of 1,3- alternate Calix[4]arene-benzocrown-bisglycolamide (6)

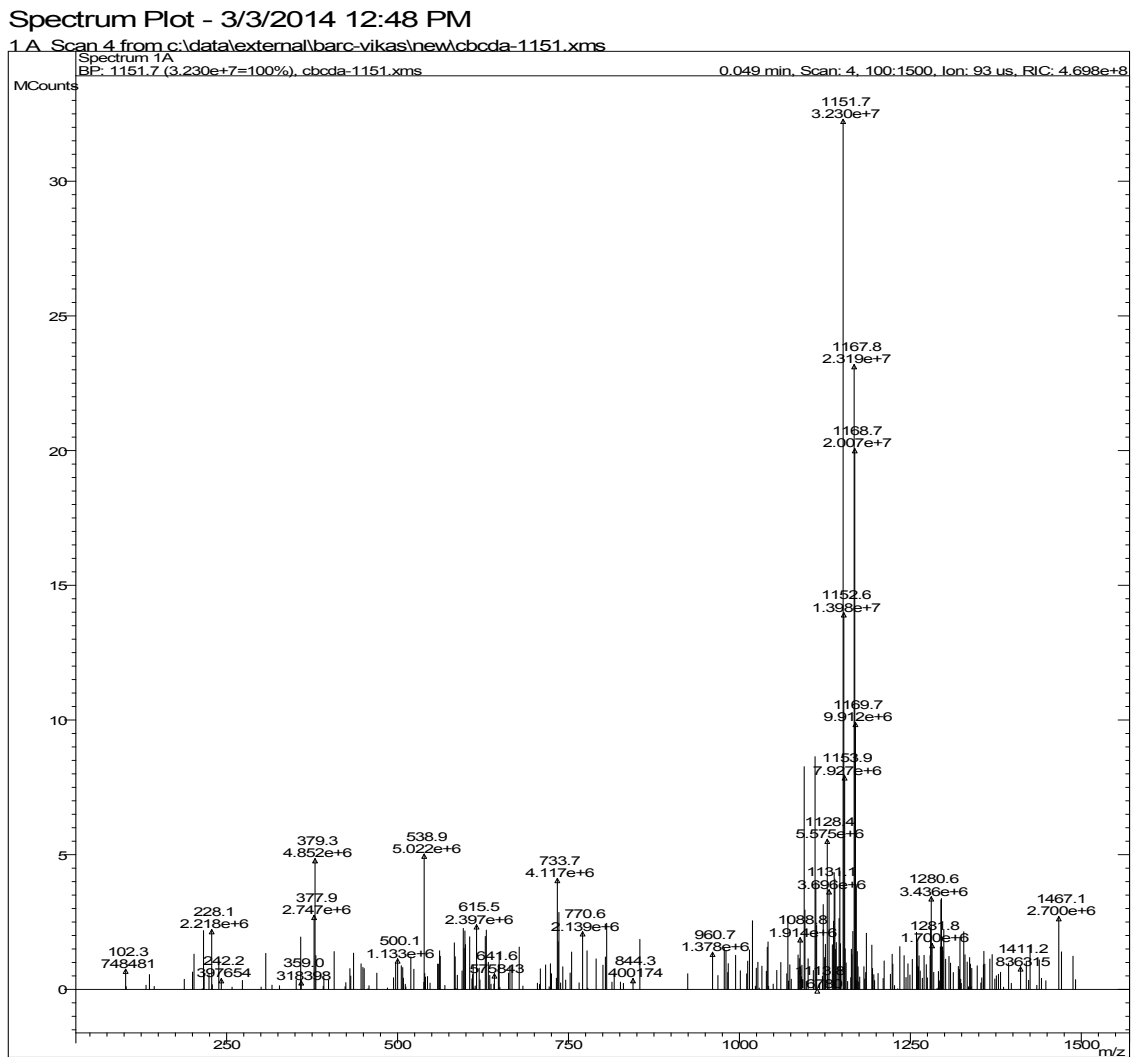

Figure S10: ESI-MS of CBCBGA complexes with Cesium

Spectrum Plot - 1/6/2014 11:41 AM

1 A Scan 37 from c:\data\external\barc-vikas\new\3-complex-1261.xms

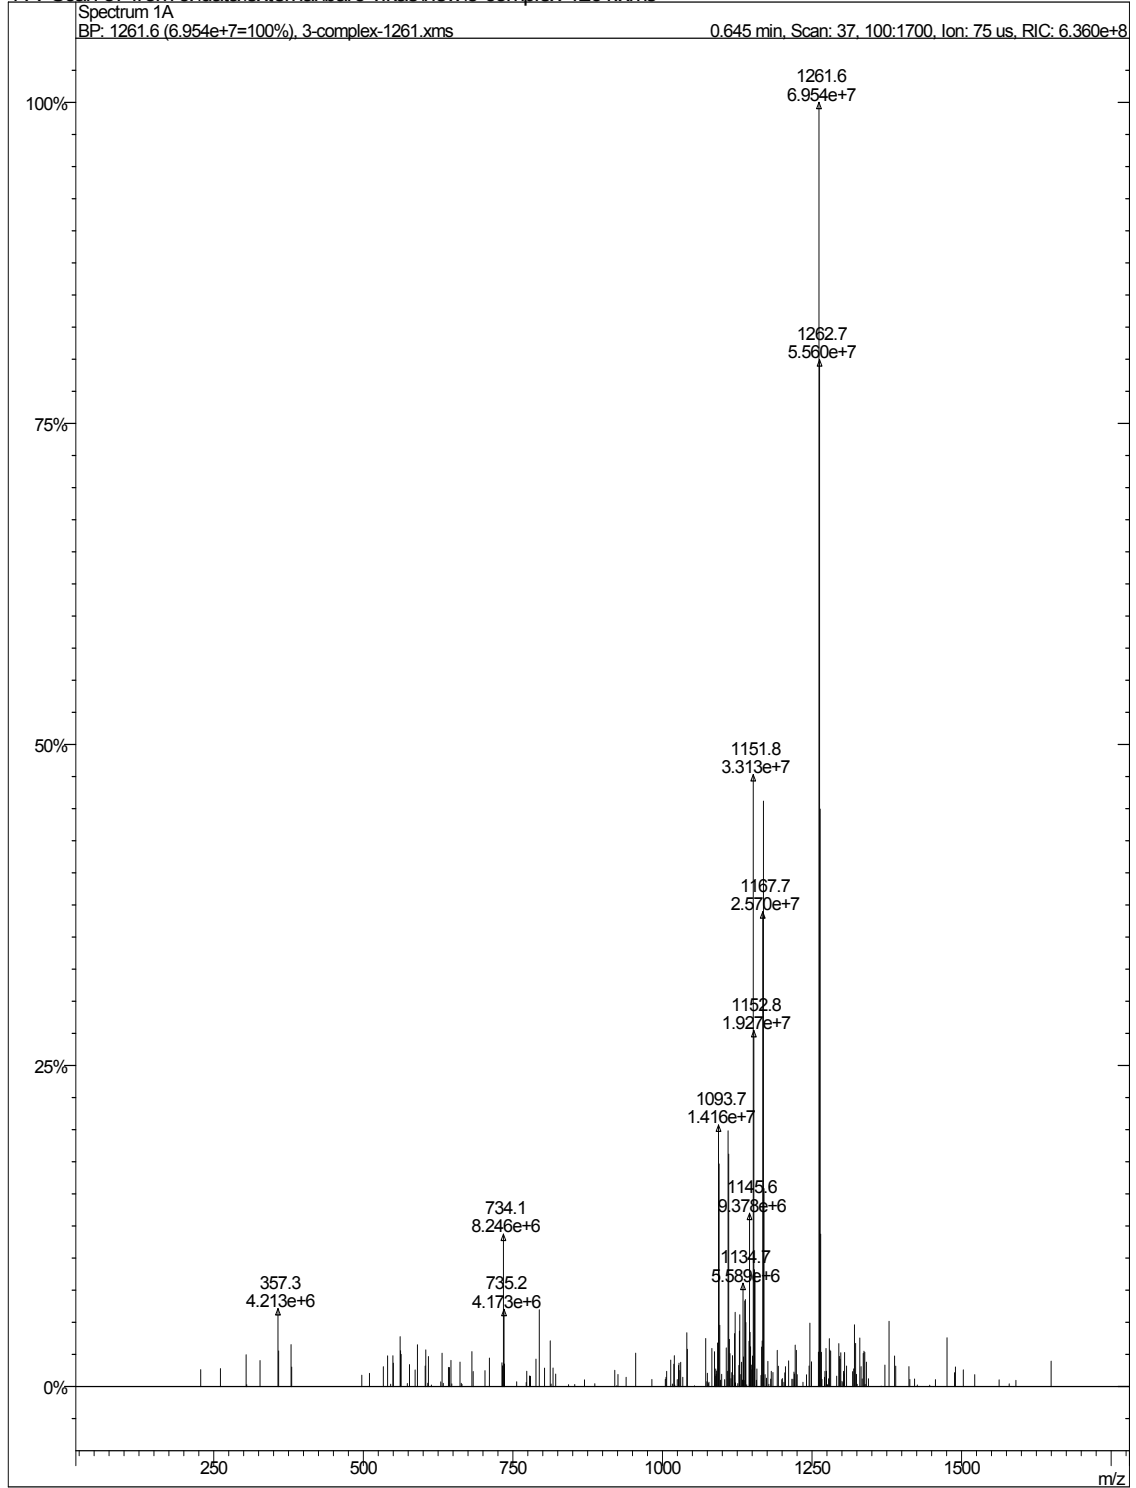

**Table S1:** Computed values of electron density and Laplacian of electron density and ellipsity of  $\text{MNO}_3\text{-CBCBGA}$  and metal ion-hydrated complexes at the B3LYP/DZP level using Bader's AIM calculation.

| Metal-ion complex                    | BCP    | $\rho$ | Ave. $\nabla^2\rho$ | Ave. $\epsilon$ |
|--------------------------------------|--------|--------|---------------------|-----------------|
| $\text{Cs}^+\text{-CBCBGA}$          | Cs-O1  | 0.0105 | 0.039               | 0.069           |
|                                      | Cs -O2 | 0.0056 |                     |                 |
|                                      | Cs -O3 | 0.0076 |                     |                 |
|                                      | Cs -O4 | 0.0103 |                     |                 |
|                                      | Cs -O5 | 0.0104 |                     |                 |
|                                      | Cs -O6 | 0.0078 |                     |                 |
|                                      | Cs -O7 | 0.0111 |                     |                 |
|                                      | Cs -O8 | 0.0130 |                     |                 |
| $\text{Na}^+\text{-CBCBGA}$          | Na-O1  | 0.0105 | 0.079               | 0.062           |
|                                      | Na -O2 | 0.0041 |                     |                 |
|                                      | Na -O3 | 0.0091 |                     |                 |
|                                      | Na -O4 | 0.0134 |                     |                 |
|                                      | Na -O5 | 0.0276 |                     |                 |
| $\text{Cs}^+\text{-(H}_2\text{O)}_8$ | Cs-O1  | 0.0082 | 0.031               | 0.078           |
|                                      | Cs -O2 | 0.0084 |                     |                 |
|                                      | Cs -O3 | 0.0080 |                     |                 |
|                                      | Cs -O4 | 0.0084 |                     |                 |
|                                      | Cs -O5 | 0.0080 |                     |                 |
|                                      | Cs -O6 | 0.0081 |                     |                 |
|                                      | Cs -O7 | 0.0076 |                     |                 |
|                                      | Cs -O8 | 0.0086 |                     |                 |
| $\text{Na}^+\text{-(H}_2\text{O)}_6$ | Na-O1  | 0.015  | 0.096               | 0.055           |
|                                      | Na -O2 | 0.015  |                     |                 |
|                                      | Na -O3 | 0.015  |                     |                 |
|                                      | Na -O4 | 0.015  |                     |                 |
|                                      | Na -O5 | 0.015  |                     |                 |
|                                      | Na -O6 | 0.015  |                     |                 |

**Table S2:** Calculated values of average second order stabilization energies  $E_{ij}^{(2)}$  using NBO analysis at the B3LYP/DZP level of theory.

| Donar nbo (i) | Acceptor nbo (j) | $E(2)$ (kcal/mol) |
|---------------|------------------|-------------------|
| LP(1)O1       | LV(1)Cs179       | 0.68              |
| LP(1)O3       | LV(1)Cs179       | 2.02              |
| LP(2)O3       | LV(1)Cs179       | 0.32              |
| LP(1)O5       | LV(1)Cs179       | 1.02              |
| LP(2)O5       | LV(1)Cs179       | 0.10              |
| LP(1)O6       | LV(1)Cs179       | 2.81              |
| LP(2)O6       | LV(1)Cs179       | 0.22              |
| LP(1)O7       | LV(1)Cs179       | 0.91              |
| LP(2)O7       | LV(1)Cs179       | 0.48              |
| LP(1)O8       | LV(1)Cs179       | 0.94              |
| LP(2)O8       | LV(1)Cs179       | 0.07              |
| LP(1)O13      | LV(1)Cs179       | 1.82              |
| LP(1)O14      | LV(1)Cs179       | 6.49              |
| LP(2)O14      | LV(1)Cs179       | 0.36              |
| LP(3)O14      | LV(1)Cs179       | 0.30              |
| LP(1)O15      | LV(1)Cs179       | 6.03              |
| LP(2)O15      | LV(1)Cs179       | 0.47              |
| LP(3)O15      | LV(1)Cs179       | 0.56              |
| Donar nbo (i) | Acceptor nbo (j) | $E(2)$ (kcal/mol) |
| LP(1)O69      | LV(1)Na87        | 1.00              |
| LP(2)O69      | LV(1)Na87        | 0.14              |
| LP(1)O70      | LV(1)Na87        | 2.27              |
| LP(1)O71      | LV(1)Na87        | 0.67              |
| LP(2)O71      | LV(1)Na87        | 0.23              |
| LP(1)O74      | LV(1)Na87        | 1.42              |
| LP(2)O74      | LV(1)Na87        | 0.07              |
| LP(1)O75      | LV(1)Na87        | 2.00              |
| LP(1)O76      | LV(1)Na87        | 0.84              |
| LP(1)O81      | LV(1)Na87        | 3.91              |

---

|          |           |      |
|----------|-----------|------|
| LP(2)O81 | LV(1)Na87 | 0.12 |
| LP(1)O82 | LV(1)Na87 | 2.93 |
| LP(2)O82 | LV(1)Na87 | 0.09 |
| LP(1)O83 | LV(1)Na87 | 1.67 |

---
